# Supplementary material for: Electrolyte selection toward efficient photoelectrochemical glycerol oxidation on BiVO 4
Source: Royal Society of Chemistry journal article supplement (doi:10.1039/d4sc01651c), 2024-01-01
Supplement: d4sc01651c1.pdf [file d4sc01651c1.pdf]

*Supporting Information*

## **Electrolyte Selection Toward Efficient Photoelectrochemical Glycerol Oxidation on BiVO<sub>4</sub>**

*Heejung Kong,<sup>1</sup> Siddharth Gupta<sup>1, 2</sup>, Andrés F. Pérez-Torres<sup>1</sup>, Christian Höhn<sup>1</sup>, Peter Bogdanoff<sup>1</sup>, Matthew T. Mayer<sup>1, 2</sup>, Roel van de Krol<sup>1, 3</sup>, Marco Favaro<sup>1, \*</sup> and Fatwa F. Abdi,<sup>1, 4, \*</sup>*

*4, \**

<sup>1</sup> Institute for Solar Fuels, Helmholtz-Zentrum Berlin für Materialien und Energie GmbH, Hahn-Meitner-Platz 1, 14109 Berlin, Germany

<sup>2</sup> Institut für Chemie & Biochemie, Freie Universität Berlin, 14195 Berlin, Germany

<sup>3</sup> Institut für Chemie, Technische Universität Berlin, Straße des 17. Juni 124, 10623 Berlin, Germany

<sup>4</sup> School of Energy and Environment, City University of Hong Kong, 83 Tat Chee Avenue, Kowloon, Hong Kong S.A.R., China

\* Authors to whom correspondence should be addressed.

M. Favaro marco.favaro@helmholtz-berlin.de

F. F. Abdi fatwa.abdi@helmholtz-berlin.de ; ffabdi@cityu.edu.hk

## Table of Contents

|                                                                                                                                                                                                                                                                                                                                                                                                                                                                                                                                                                                                                                                                                                                                                                                                                                                                                                                                                                                                                                                                                                                                                                                                                                                                                                                                                                                                                                                                                                                                                                                                                                                                                                                                                                                                                                                                            |      |
|----------------------------------------------------------------------------------------------------------------------------------------------------------------------------------------------------------------------------------------------------------------------------------------------------------------------------------------------------------------------------------------------------------------------------------------------------------------------------------------------------------------------------------------------------------------------------------------------------------------------------------------------------------------------------------------------------------------------------------------------------------------------------------------------------------------------------------------------------------------------------------------------------------------------------------------------------------------------------------------------------------------------------------------------------------------------------------------------------------------------------------------------------------------------------------------------------------------------------------------------------------------------------------------------------------------------------------------------------------------------------------------------------------------------------------------------------------------------------------------------------------------------------------------------------------------------------------------------------------------------------------------------------------------------------------------------------------------------------------------------------------------------------------------------------------------------------------------------------------------------------|------|
| <b>1. Methods</b> .....                                                                                                                                                                                                                                                                                                                                                                                                                                                                                                                                                                                                                                                                                                                                                                                                                                                                                                                                                                                                                                                                                                                                                                                                                                                                                                                                                                                                                                                                                                                                                                                                                                                                                                                                                                                                                                                    | [4]  |
| <b>2. Figures for the Supporting Information</b> .....                                                                                                                                                                                                                                                                                                                                                                                                                                                                                                                                                                                                                                                                                                                                                                                                                                                                                                                                                                                                                                                                                                                                                                                                                                                                                                                                                                                                                                                                                                                                                                                                                                                                                                                                                                                                                     | [10] |
| <ul style="list-style-type: none"><li>• <b>Figure S1.</b> SEM image of the nanoporous BiVO<sub>4</sub> film used in our study.</li><li>• <b>Figure S2.</b> (a) XRD pattern of the BiVO<sub>4</sub> film and FTO substrate. (b) Tauc plot of the BiVO<sub>4</sub> film for the indirect bandgap estimation.</li><li>• <b>Figure S3.</b> Dark LSV curves measured in various acidic (pH = 2) electrolyte solutions (a) without glycerol and (b) with 0.1 M glycerol.</li><li>• <b>Figure S4.</b> LSV curves recorded under AM 1.5G illumination in various acidic (pH = 2) electrolyte solutions: (a) KPi, (b) K<sub>2</sub>SO<sub>4</sub>, (c) Na<sub>2</sub>SO<sub>4</sub>, (d) NaClO<sub>4</sub>, and (e) NaNO<sub>3</sub>, all of which had a concentration of 0.5 M and did not contain glycerol. Three distinct BiVO<sub>4</sub> samples (Sample 1 – 3) were employed for the measurements in each solution as a reproducibility check.</li><li>• <b>Figure S5.</b> LSV curves recorded under AM 1.5G illumination in various acidic (pH = 2) electrolyte solutions: (a) KPi, (b) K<sub>2</sub>SO<sub>4</sub>, (c) Na<sub>2</sub>SO<sub>4</sub>, (d) NaClO<sub>4</sub>, and (e) NaNO<sub>3</sub>, all had a concentration of 0.5 M and contained 0.1 M glycerol. Three distinct BiVO<sub>4</sub> samples (Sample 1 – 3) were employed for the measurements in each solution as a reproducibility check.</li><li>• <b>Figure S6.</b> LSV curves measured under AM 1.5G illumination in various acidic (pH = 2) electrolyte solutions containing 0.5 M of glycerol.</li><li>• <b>Figure S7.</b> (a) LSV curves of BiVO<sub>4</sub> in a pH 1 NaNO<sub>3</sub> solution containing 0.5 M glycerol. (b) CA curves recorded at 1.23 V<sub>RHE</sub> for 12 hours in NaNO<sub>3</sub> solutions at pH 1 and pH 2, with an initial glycerol concentration of 0.5 M.</li></ul> |      |

- **Figure S8.** X-ray photoelectron spectroscopy (XPS) Bi 4f core-level spectra of the (a) pristine sample and samples subjected to 12-hour chronoamperometry (CA) tests in (b) NaNO<sub>3</sub>, (c) NaClO<sub>4</sub>, (d) Na<sub>2</sub>SO<sub>4</sub>, and (e) K<sub>2</sub>SO<sub>4</sub>.
- **Figure S9.** X-ray photoelectron spectroscopy (XPS) O 1s and V 2p core-level spectra of the (a) pristine sample and samples subjected to 12-hour chronoamperometry (CA) tests in (b) NaNO<sub>3</sub>, (c) NaClO<sub>4</sub>, (d) Na<sub>2</sub>SO<sub>4</sub>, and (e) K<sub>2</sub>SO<sub>4</sub>.
- **Figure S10.** Calibration data for glycerol in high-performance liquid chromatography (HPLC) analysis.
- **Figure S11.** Calibration data for dihydroxyacetone (DHA) in high-performance liquid chromatography (HPLC) analysis.
- **Figure S12.** Calibration data for glycolaldehyde (GCAD), glyceraldehyde (GLAD), formic acid (FA), glyceric acid (GA), glycolic acid (GCA), and lactic acid (LA) in high-performance liquid chromatography (HPLC) analysis.
- **Figure S13.** High-performance liquid chromatography (HPLC) chromatograms for the NaNO<sub>3</sub> case.
- **Figure S14.** High-performance liquid chromatography (HPLC) chromatograms for the NaClO<sub>4</sub> case.
- **Figure S15.** High-performance liquid chromatography (HPLC) chromatograms for the Na<sub>2</sub>SO<sub>4</sub> case.
- **Figure S16.** High-performance liquid chromatography (HPLC) chromatograms for the K<sub>2</sub>SO<sub>4</sub> case.
- **Figure S17.** Mass spectroscopy (MS) measured in a pH 2 NaNO<sub>3</sub> solution.
- **Figure S18.** Chromatograms of aqueous ammonia (NH<sub>3</sub>) solutions and pH 2 NaNO<sub>3</sub> solutions (NaNO<sub>3</sub> concentration = 0.5 M) obtained via high-performance liquid chromatography (HPLC).

- **Figure S19.** Full range Raman scattering spectra taken on different liquid samples, at a laser wavelength of 785 nm and a total spectral power of 450 mW. The spectrometer (Wasatch Photonics WP785ER) has an average spectral resolution of about 5  $\text{cm}^{-1}$ . The Raman shift scale was calibrated using the Si 520  $\text{cm}^{-1}$  mode. The spectra have been recorded at about 22 °C, using a 2 mL optical grade-quartz cuvette.
- **Figure S20.** C–O stretching band region for the spectral references, 0.5 M glycerol (a) and 0.5  $\text{NaNO}_3$  (b). The spectra have been recorded at about 22 °C, using a 2 mL optical grade-quartz cuvette, at a laser wavelength of 785 nm, and a total spectral power of 450 mW.

### 3. Tables for the Supporting Information ..... [30]

- **Table S1.** Water oxidation photocurrent values expressed in  $\text{mA cm}^{-2}$  at 1.23  $V_{\text{RHE}}$ , extracted from **Figure S4**.
- **Table S2.** Glycerol oxidation photocurrent values expressed in  $\text{mA cm}^{-2}$  at 1.23  $V_{\text{RHE}}$ , extracted from **Figure S5**.
- **Table S3.** The impact of adding 50 mM protons to the pH of the 0.5 M  $\text{KP}_i$  + 0.1 M glycerol solution.
- **Table S4.** The impact of adding 50 mM protons to the pH of the 0.5 M  $\text{K}_2\text{SO}_4$  + 0.1 M glycerol solution.
- **Table S5.** The impact of adding 50 mM protons to the pH of the 0.5 M  $\text{Na}_2\text{SO}_4$  + 0.1 M glycerol solution.
- **Table S6.** The impact of adding 50 mM protons to the pH of the 0.5 M  $\text{Na}_2\text{SO}_4$  + 0.1 M glycerol solution.
- **Table S7.** The impact of adding 50 mM protons to the pH of the 0.5 M  $\text{NaNO}_3$  + 0.1 M glycerol solution.

## 1. Methods

### Sample preparation

First, 0.4 M of potassium iodide (Santa Cruz Biotechnology) was completely dissolved in 50 mL of deionized water (18.2 M $\Omega$ ), followed by adding 0.1 mL of nitric acid (>69.0%, Honeywell) and 0.04 M of bismuth nitrate pentahydrate (Acros Organics). The solution was stirred using a magnetic bar until the salts were fully dissolved. Second, a 20 mL ethanolic solution with 0.225 M of p-benzoquinone (Alfa Aesar) was prepared. Subsequently, the aqueous solution was slowly added to the ethanolic solution, resulting in a very dark red but clear solution. Next, BiOI nanosheet arrays were grown on FTO substrates with a sheet resistance of 7  $\Omega$  sq<sup>-1</sup> (Sigma Aldrich) through electrodeposition. In the electrodeposition process, a platinum coiled wire with a diameter of 0.5 mm and an Ag/AgCl (saturated KCl) electrode (XR300, Radiometer Analytical) were employed as the counter electrode and the reference electrode, respectively. With the three electrodes immersed in the solution, a constant potential of -0.1 V vs. Ag/AgCl was applied until reaching a charge of 200 mC cm<sup>-2</sup>, resulting in the formation of red-orange films. Subsequently, the BiOI films were coated with a 50  $\mu$ L cm<sup>-2</sup> solution of 0.2 M vanadyl acetylacetonate (Acros Organics) in dimethyl sulfoxide (VWR Life Science). The coated films were then annealed on a hot plate at 450 °C for 2 hours with a ramping rate of 5 K min<sup>-1</sup> to induce the conversion into monoclinic BiVO<sub>4</sub>. Finally, excess V<sub>2</sub>O<sub>5</sub> layers were removed by immersing the samples into a 1 M NaOH (Sigma Aldrich) solution for 15 minutes.

### Preparation of electrolyte solutions

The following chemicals were employed in the synthesis of electrolyte solutions: glycerol (>99% Sigma Aldrich), NaNO<sub>3</sub> (>99.0%, Sigma Aldrich), Na<sub>2</sub>SO<sub>4</sub> (>99%, Sigma Aldrich), K<sub>2</sub>SO<sub>4</sub> (>99%, Santa Cruz Biotechnology), KH<sub>2</sub>PO<sub>4</sub> (>99.0%, Sigma Aldrich), K<sub>2</sub>HPO<sub>4</sub> (>99.0%, Sigma Aldrich), HNO<sub>3</sub> (>69.0%, Honeywell), H<sub>2</sub>SO<sub>4</sub> (97%, Honeywell), and H<sub>3</sub>PO<sub>4</sub> (>85%,

Honeywell). Deionized water with a resistivity of 18.2 M $\Omega$  cm, produced by a water purification system (Merck Millipore), was used as a solvent. The concentration of all solutions was 0.5 M. The pH values of the solutions were carefully adjusted to 2 by adding a suitable acid (HNO<sub>3</sub> for NaNO<sub>3</sub>, H<sub>2</sub>SO<sub>4</sub> for Na<sub>2</sub>SO<sub>4</sub> and K<sub>2</sub>SO<sub>4</sub>, or H<sub>3</sub>PO<sub>4</sub> for KP<sub>1</sub>, respectively) to prevent mixing different kinds of anions.

### **Electrochemical experiments**

Electrochemical measurements were conducted using a potentiostat (VersaSTAT 3F, Princeton Applied Research). The same reference electrode and counter electrode used during the electrodeposition process were employed. An AM1.5G solar simulator (WACOM WXS-50S-5H Class AAA) with an irradiance of 100 mW cm<sup>-2</sup> was employed as the light source. In the PEC measurements, the light was illuminated from the backside (i.e., the rear of the sample through the FTO-substrate side). The scan rate in LSV was set at 20 mV s<sup>-1</sup>. Chronoamperometry was performed at 1.23 V<sub>RHE</sub> under the same AM1.5G illumination. The applied potential with respect to the Ag/AgCl (V<sub>Ag/AgCl</sub>) reference electrode was converted to the V<sub>RHE</sub> scale using the following Nernst equation:

$$V_{\text{RHE}} = V_{\text{Ag/AgCl}} + 0.059 \times \text{pH} + V^0_{\text{Ag/AgCl}} \quad [1]$$

where  $V^0_{\text{Ag/AgCl}}$  is the standard potential of the reference electrode (0.197 V). No iR correction was performed to present the data, considering the relatively small current (maximum current ~2 mA) and cell impedance (~10  $\Omega$ ) during all electrochemical measurements.

### **Product analysis using high-performance liquid chromatography (HPLC)**

Liquid samples, collected after 12 hours of photoelectrolysis at a constant potential of 1.23 V<sub>RHE</sub> in various electrolyte solutions, were analyzed using an HPLC system (UltiMate 3000, Thermo Scientific) for quantifying glycerol oxidation reaction (GOR) products. The system was

equipped with a single column (HyperREZ XP H+, Thermo Scientific) and utilized both a wavelength-variable UV detector (UltiMate 3000, Thermo Scientific) and a refractive index (RI) detector (RefractoMax 520, Thermo Scientific). The flow rate was maintained at 0.5 mL min<sup>-1</sup>, and the column temperature was held constant at 60°C. A 5 mM H<sub>2</sub>SO<sub>4</sub> aqueous solution was employed as the mobile phase.

The following chemicals were used as reference GOR products: dihydroxyacetone (DHA, for synthesis, Sigma Aldrich), formic acid (FA, 98–100%, Sigma Aldrich), DL-glyceraldehyde (GLAD, >90%, Sigma Aldrich), glycolaldehyde dimer (GCAD, Sigma Aldrich), glycolic acid (GCA, 98%, Thermo Scientific), DL-glyceric acid (GA, ~2 M in water, Chem Cruz), and lactic acid (LA, 85%, Sigma Aldrich). For calibration, five aqueous solutions with varying concentrations (100–500 mM in increments of 100 mM for glycerol and 1–5 mM in increments of 1 mM for GOR products) were analyzed using the RI detector and the UV detector at 200 nm and 210 nm, as depicted in **Figure S9–S11**. We integrated the areas under their peaks to establish a linear relationship between the concentration and the peak area, also shown in **Figure S9–S11**. Selectivity (*S*) towards product *i* (e.g., *S*<sub>GCAD</sub>) was calculated using the following formula:

$$S_i (\%) = 100 \times mol_i / mol_{total} \quad [2]$$

where *mol<sub>i</sub>* represents the amount of product *i* in moles, and *mol<sub>total</sub>* represents the total amount of all products, also in moles. For example, since GCAD, GLAD, DHA, and FA were the only products produced in our case, *mol<sub>total</sub>* was calculated using the following formula:

$$mol_{total} = mol_{GCAD} + mol_{GLAD} + mol_{DHA} + mol_{FA} \quad [3]$$

Faradaic efficiency (FE) was calculated using the following formula:

$$FE (\%) = 100 \times Q_{GOR} / Q_{total} \quad [4]$$

where  $Q_{total}$  is the total charge passed during the photoelectrolysis, and  $Q_{GOR}$  represents the charge used to oxidize glycerol.  $Q_{GOR}$  can be calculated using the following formula:

$$Q_{GOR} = \sum_i^{all} mol_i \times q_i \quad [5]$$

where  $q_i$  represents the molar charge ( $C \text{ mol}^{-1}$ ) that is used to produce product  $i$  (e.g.,  $q_{GCAD}$ ).

The value of  $q_i$  varies depending on the product ( $q_{GCAD} = 4/3$ ,  $q_{GLAD} = q_{DHA} = 2$ , and  $q_{FA} = 8/3$ )

based on the stoichiometry of the respective reactions:

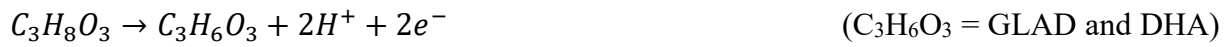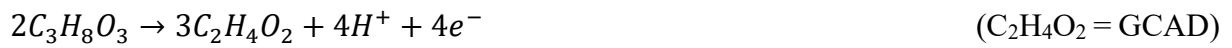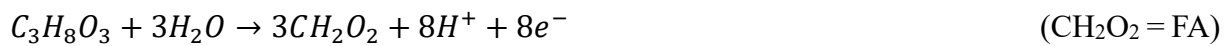

## Characterizations

X-ray diffraction (XRD) was conducted using an X-ray diffractometer (X'Pert, PANalytical). A Cu K $\alpha$  radiation with a wavelength of 1.5406 Å was employed, and the incident angle of the X-ray was set to 2°. X-ray photoelectron spectroscopy (XPS) analyses were performed using a monochromatic Al K $\alpha$  X-ray source (Focus 500, Specs), with a photon energy of 1486.84 eV, and an electron analyzer (Phoibos 100, Specs). Binding energy (BE) calibration was performed by referencing the peak position of Au 4f $_{7/2}$  at 84.0 eV. Scanning electron microscopy (SEM) was carried out using a GeminiSEM 360 instrument (ZEISS). UV-Vis spectroscopy was performed using a Lambda 950 spectrophotometer (PerkinElmer). The electrical conductivity of the electrolyte solutions was measured using a Crison Basic 30 conductivity meter. Raman measurements were performed using a customized fiber-coupled system (Wasatch Photonics WP785ER), operating at NIR with a laser wavelength of 785 nm, and at a total spectral power tunable between 5 and 450 mW. The spectrometer has an average spectral resolution of about 5 cm $^{-1}$  within the probed energy range (260 cm $^{-1}$ –3600 cm $^{-1}$ ). The Raman shift scale was



calibrated using the Si 520  $\text{cm}^{-1}$  mode, while the total spectral power at the focal length (about 11 mm from the objective lens) was calibrated using a Si photodiode (Thorlabs PM16-121). The spectra of the pristine liquid samples were recorded at about 22 °C, using a 2 mL optical grade-quartz cuvette. The temperature was measured in close proximity to the sample and logged throughout the measurements using a local temperature probe (Thorlabs TSP01-TH). The integration time for all the measurements reported in this work was set to 2000 ms. To obtain a satisfactory statistics on the collected spectra, multiple spectra (about 25) were collected and averaged.

## 2. Figures for the Supporting Information

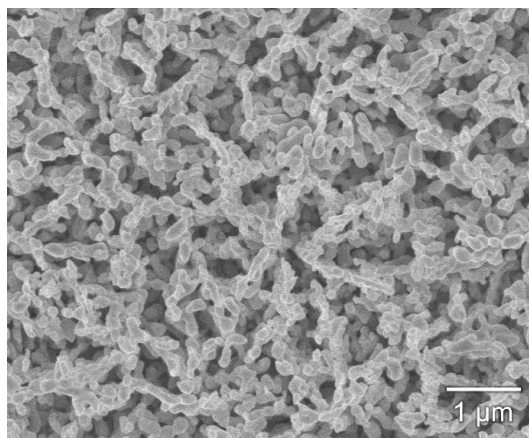

**Figure S1.** SEM image of the nanoporous BiVO<sub>4</sub> film used in our study.

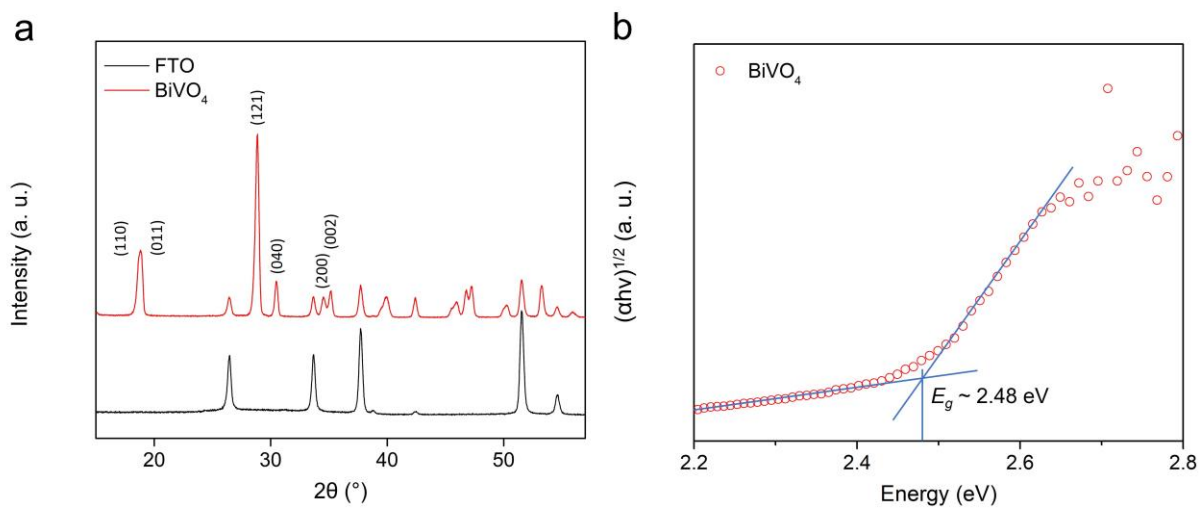

**Figure S2.** (a) XRD pattern of the BiVO<sub>4</sub> film and FTO substrate. (b) Tauc plot of the BiVO<sub>4</sub> film for the indirect bandgap estimation.

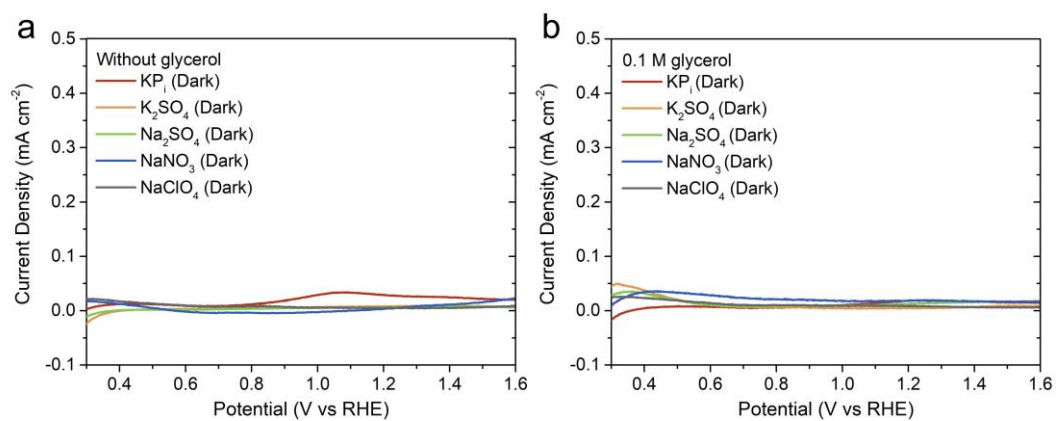

**Figure S3.** Dark LSV curves measured in various acidic (pH = 2) electrolyte solutions **(a)** without glycerol and **(b)** with 0.1 M glycerol.

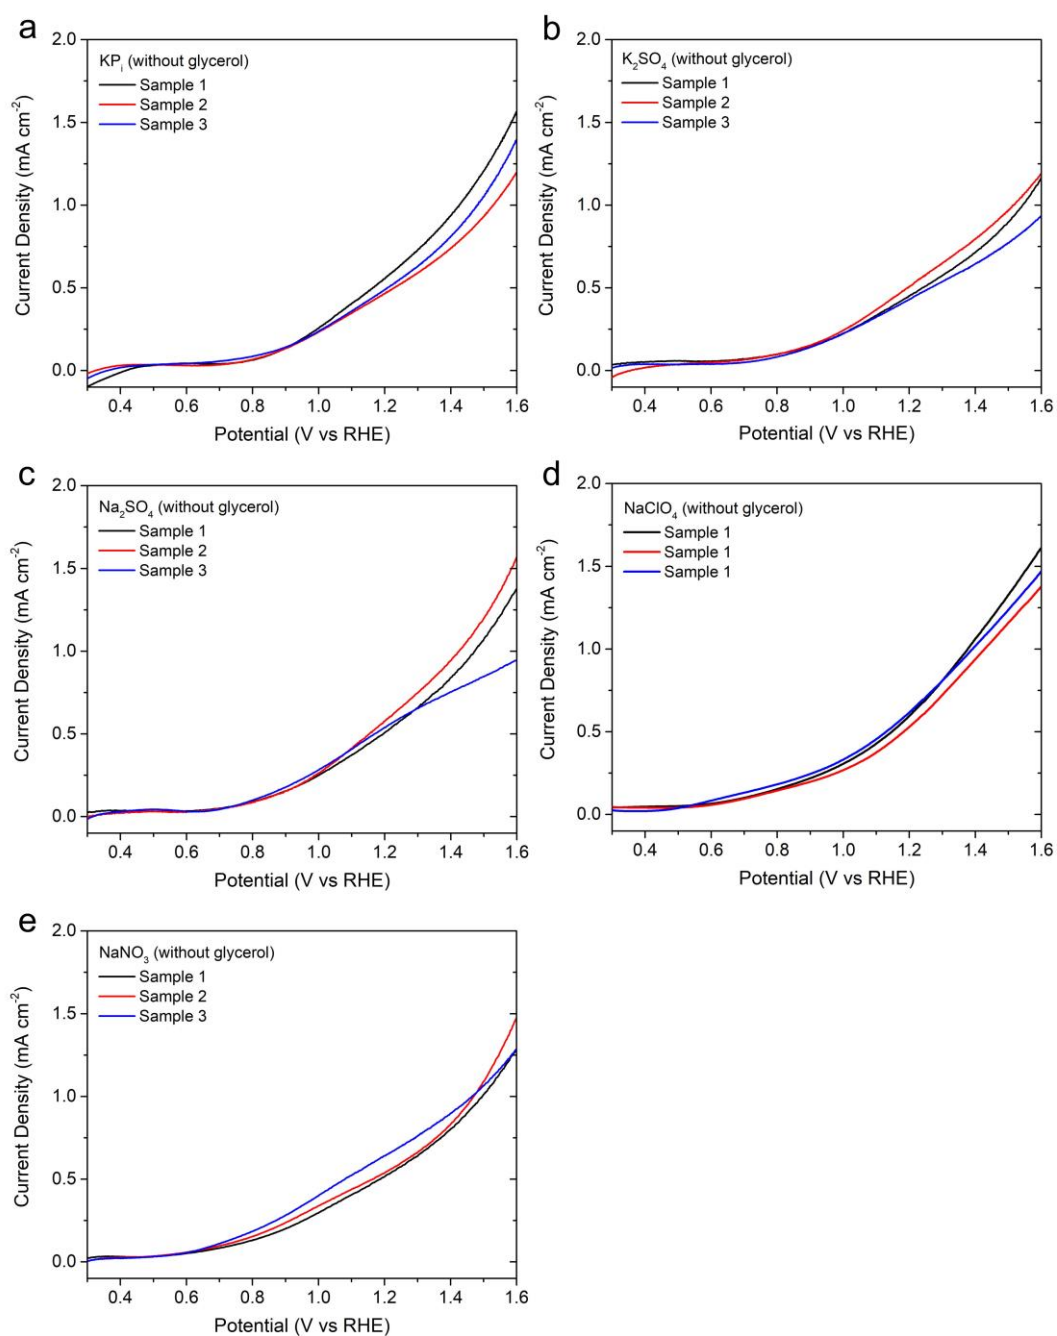

**Figure S4.** LSV curves recorded under AM 1.5G illumination in various acidic (pH = 2) electrolyte solutions: **(a)** KP<sub>1</sub>, **(b)** K<sub>2</sub>SO<sub>4</sub>, **(c)** Na<sub>2</sub>SO<sub>4</sub>, **(d)** NaClO<sub>4</sub>, and **(e)** NaNO<sub>3</sub>, all of which had a concentration of 0.5 M and did not contain glycerol. Three distinct BiVO<sub>4</sub> samples (Sample 1 – 3) were employed for the measurements in each solution as a reproducibility check.

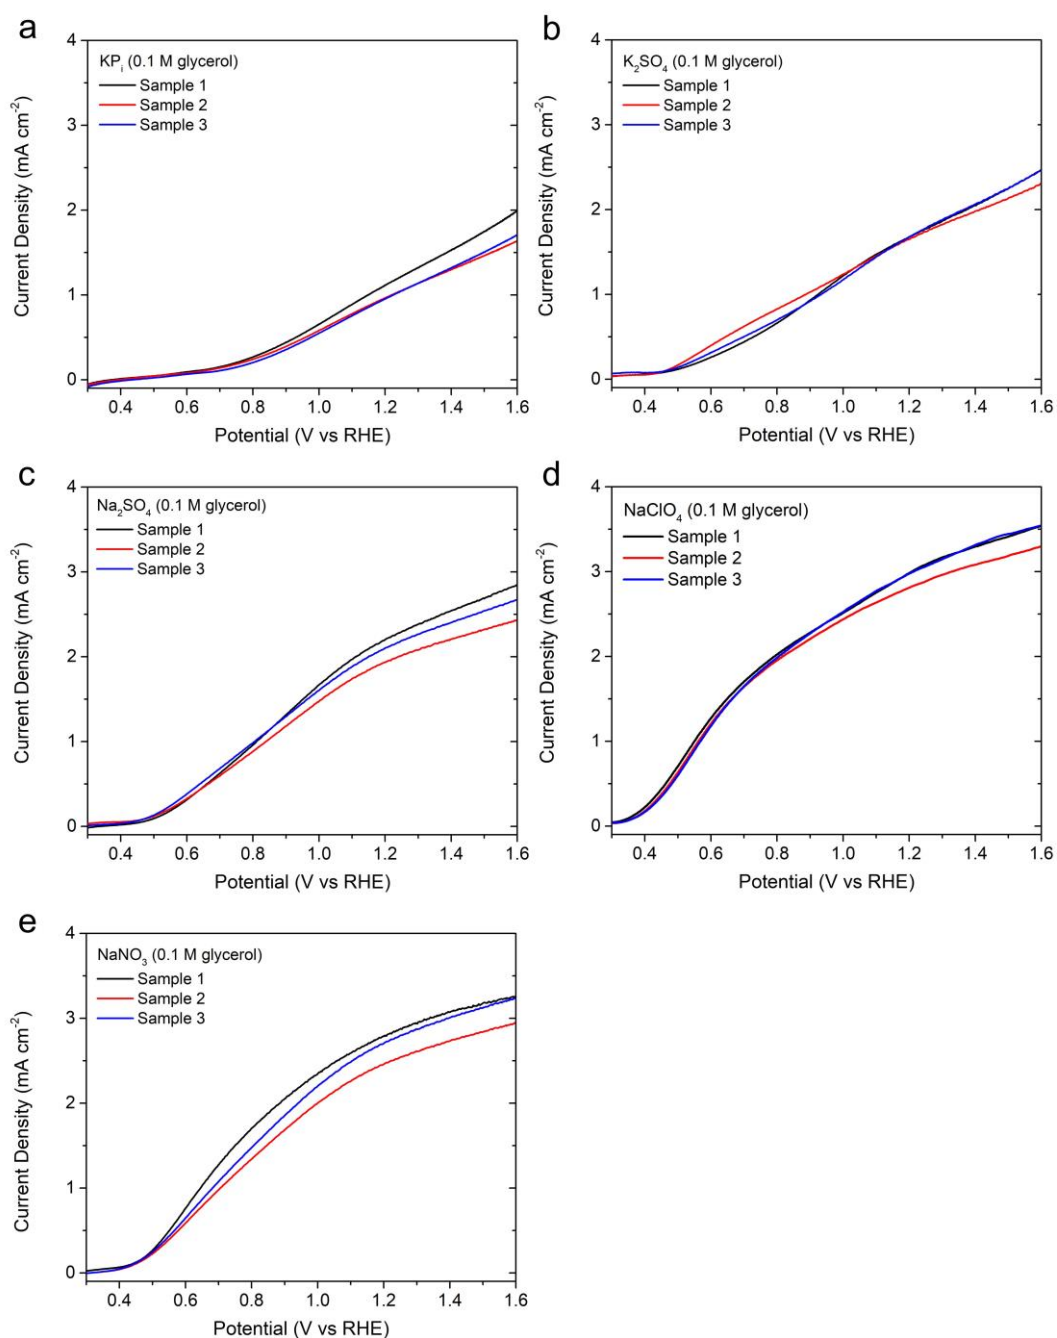

**Figure S5.** LSV curves recorded under AM 1.5G illumination in various acidic (pH = 2) electrolyte solutions: **(a)** KPi, **(b)** K<sub>2</sub>SO<sub>4</sub>, **(c)** Na<sub>2</sub>SO<sub>4</sub>, **(d)** NaClO<sub>4</sub>, and **(e)** NaNO<sub>3</sub>, all had a concentration of 0.5 M and contained 0.1 M glycerol. Three distinct BiVO<sub>4</sub> samples (Sample 1 – 3) were employed for the measurements in each solution as a reproducibility check.

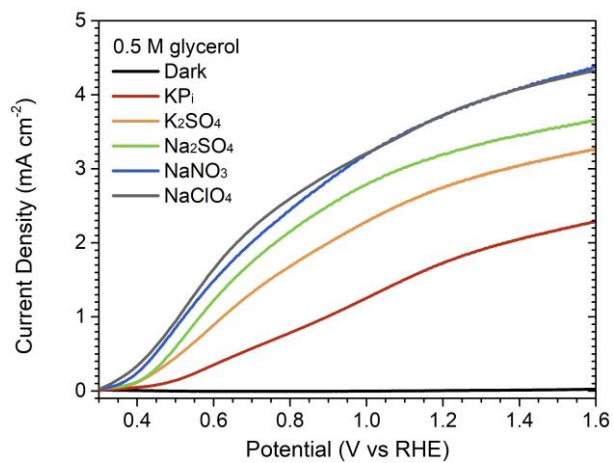

**Figure S6.** LSV curves measured under AM 1.5G illumination in various acidic (pH = 2) electrolyte solutions containing 0.5 M of glycerol.

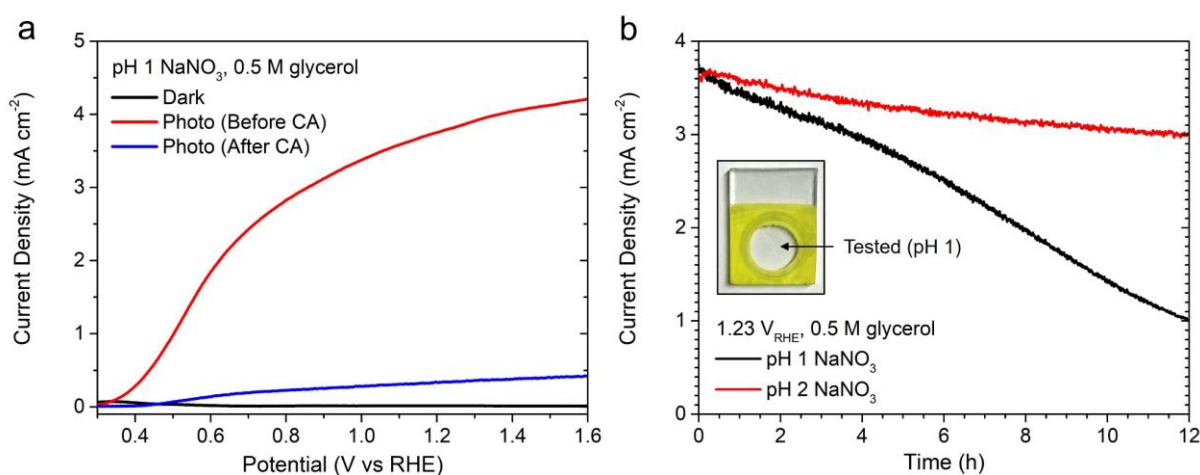

**Figure S7. (a)** Linear sweep voltammetry (LSV) curves of  $\text{BiVO}_4$  in a pH 1  $\text{NaNO}_3$  solution containing 0.5 M glycerol ( $\text{NaNO}_3$  concentration = 0.5 M). The red and blue curves represent the LSV measurements taken before (red) and after (blue) the chronoamperometry (CA) measurements shown in **(b)**. **(b)** CA curves recorded at  $1.23 \text{ V}_{\text{RHE}}$  for 12 hours in  $\text{NaNO}_3$  solutions at pH 1 (black) and pH 2 (red), with an initial glycerol concentration of 0.5 M. The inset in **(b)** shows the digital photograph of the sample taken after the 12-hour CA in the pH 1  $\text{NaNO}_3$  solution.



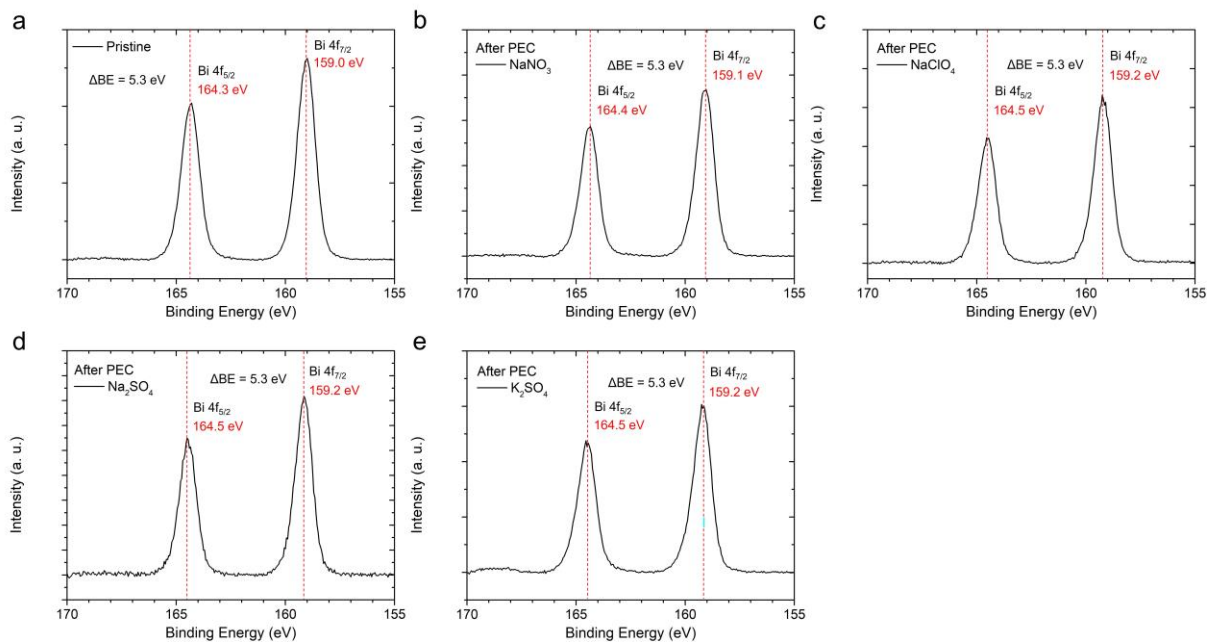

**Figure S8.** X-ray photoelectron spectroscopy (XPS) Bi 4f core-level spectra of the (a) pristine sample and samples subjected to 12-hour chronoamperometry (CA) tests in (b) NaNO<sub>3</sub>, (c) NaClO<sub>4</sub>, (d) Na<sub>2</sub>SO<sub>4</sub>, and (e) K<sub>2</sub>SO<sub>4</sub>.

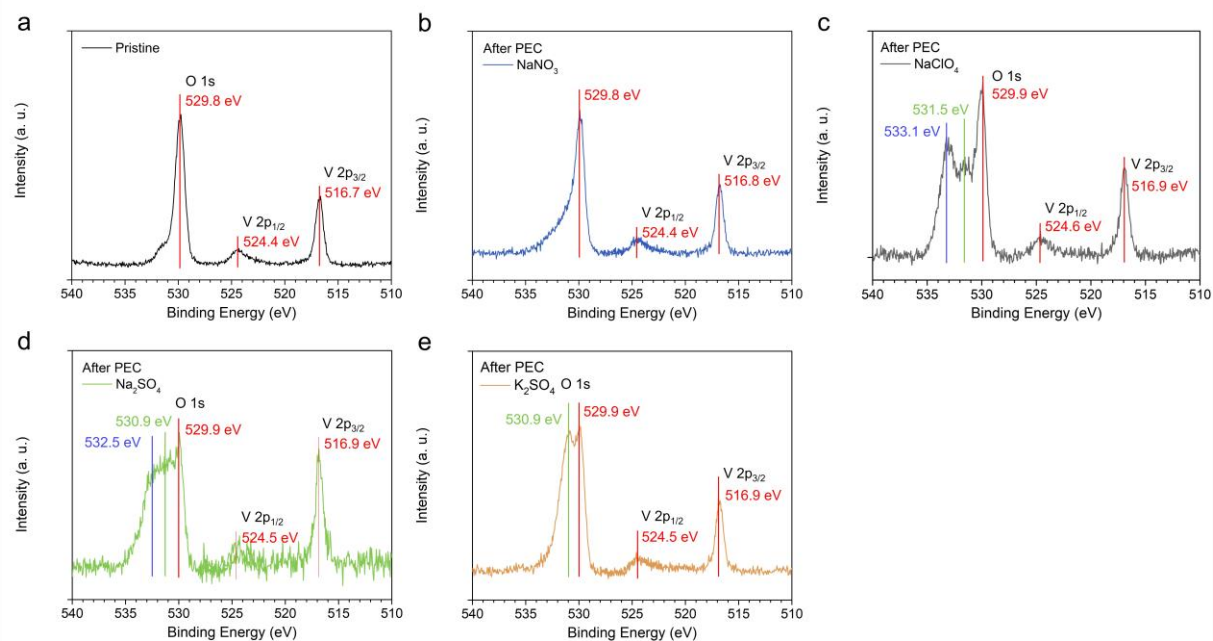

**Figure S9.** X-ray photoelectron spectroscopy (XPS) O 1s and V 2p core-level spectra of the **(a)** pristine sample and samples subjected to 12-hour chronoamperometry (CA) tests in **(b)**  $\text{NaNO}_3$ , **(c)**  $\text{NaClO}_4$ , **(d)**  $\text{Na}_2\text{SO}_4$ , and **(e)**  $\text{K}_2\text{SO}_4$ .

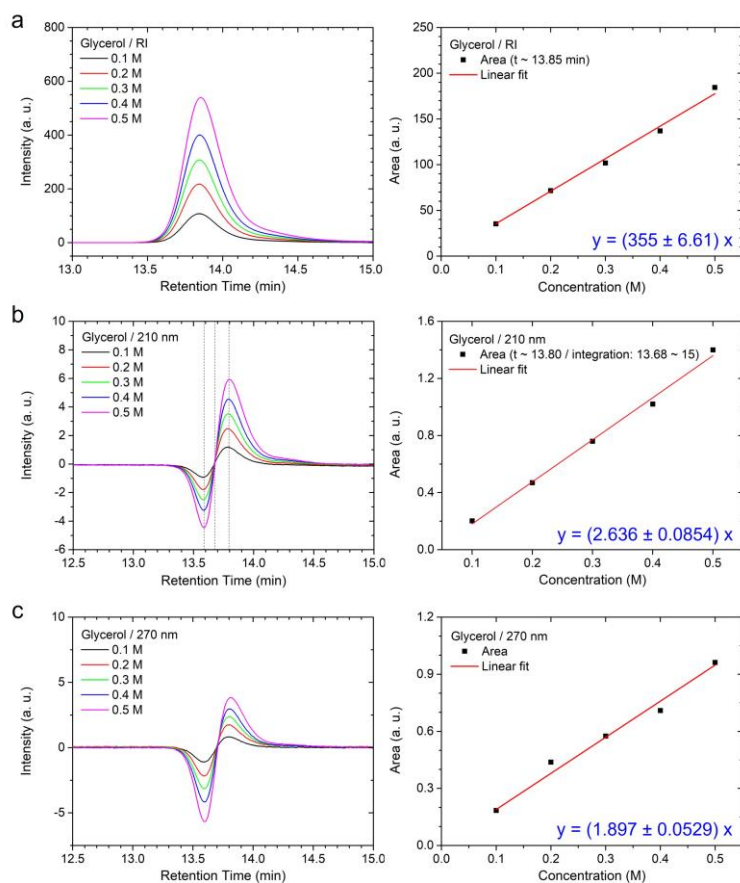

**Figure S10.** Calibration data for glycerol used in high-performance liquid chromatography (HPLC) analysis using **(a)** a refractive index (RI) detector and UV detectors at **(b)** 210 nm and **(c)** 270 nm wavelengths. Each plot consists of two panels: the left panel displays the chromatogram, while the right panel illustrates the linear relationship between the peak area and the concentration of glycerol.

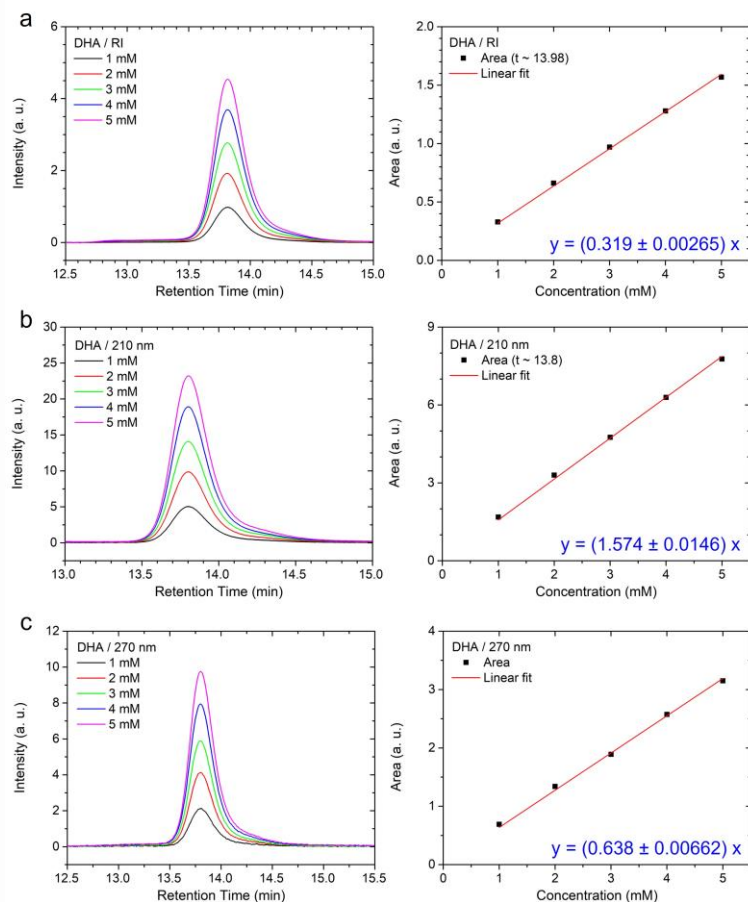

**Figure S11.** Calibration data for dihydroxyacetone (DHA) used in high-performance liquid chromatography (HPLC) analysis using **(a)** a refractive index (RI) detector and UV detectors at **(b)** 210 nm and **(c)** 270 nm wavelengths. Each plot consists of two panels: the left panel displays the chromatogram, while the right panel illustrates the linear relationship between the peak area and the concentration of DHA.

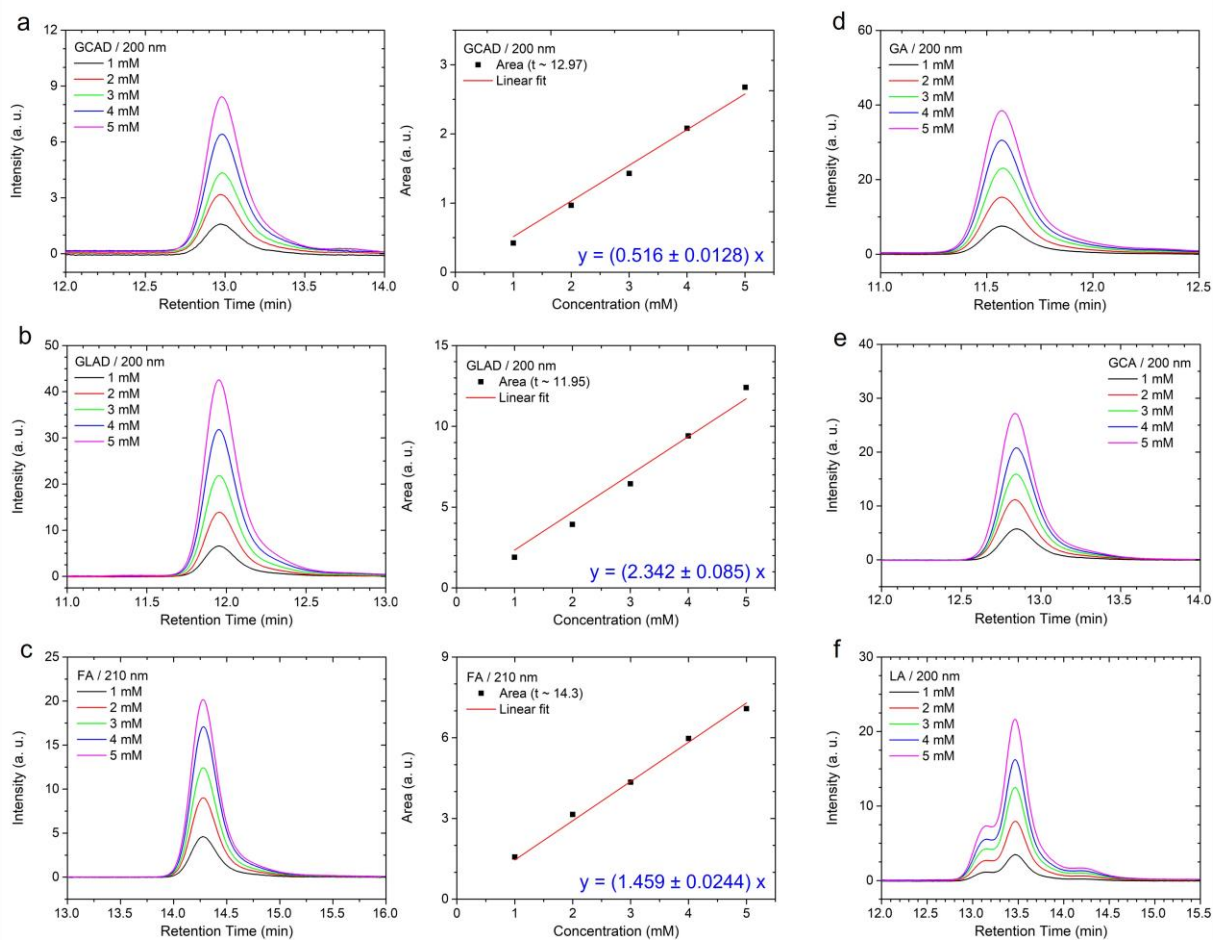

**Figure S12.** Calibration data for **(a)** glycolaldehyde (GCAD), **(b)** glyceraldehyde (GLAD), **(c)** formic acid (FA), **(d)** glyceric acid (GA), **(e)** glycolic acid (GCA), and **(f)** lactic acid (LA) used in high-performance liquid chromatography (HPLC) analysis. Except for FA, which was analyzed using a UV detector at 210 nm, the other products were analyzed using a UV detector at 200 nm. For **(a)** to **(c)**, the left panel displays the chromatogram, while the right panel illustrates the linear relationship between the peak area and each product's concentration. For GA, GCA, and LA, a peak area-concentration plot is not provided, as these chemicals were not detected in our experiments (refer to **Figure S13–S16**).

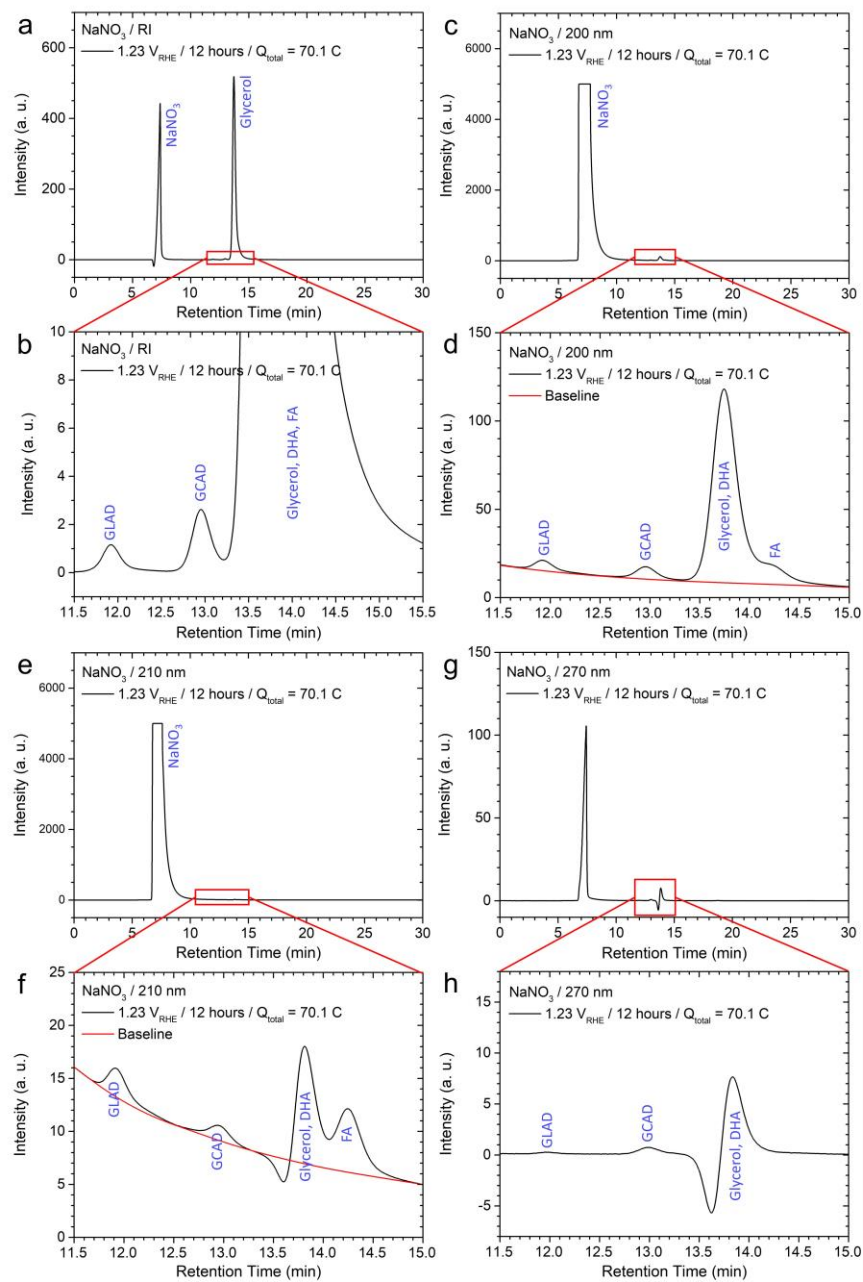

**Figure S13.** Product analysis using high-performance liquid chromatography (HPLC) in the  $\text{NaNO}_3$  case. Chronoamperometry was performed in a pH 2  $\text{NaNO}_3$  (0.5 M) solution containing 0.5 M glycerol at a constant potential of  $1.23 V_{\text{RHE}}$  for 12 hours, after which the solution was collected and analyzed. Chromatograms obtained using **(a, b)** a refractive index (RI) detector, **(c, d)** a UV detector at 200 nm, **(e, f)** a UV detector at 210 nm, and **(g, h)** a UV detector at 270 nm are shown. The lower row plots **(b, d, f, and h)** display magnified chromatograms of the regions highlighted by red rectangles in the upper row plots.

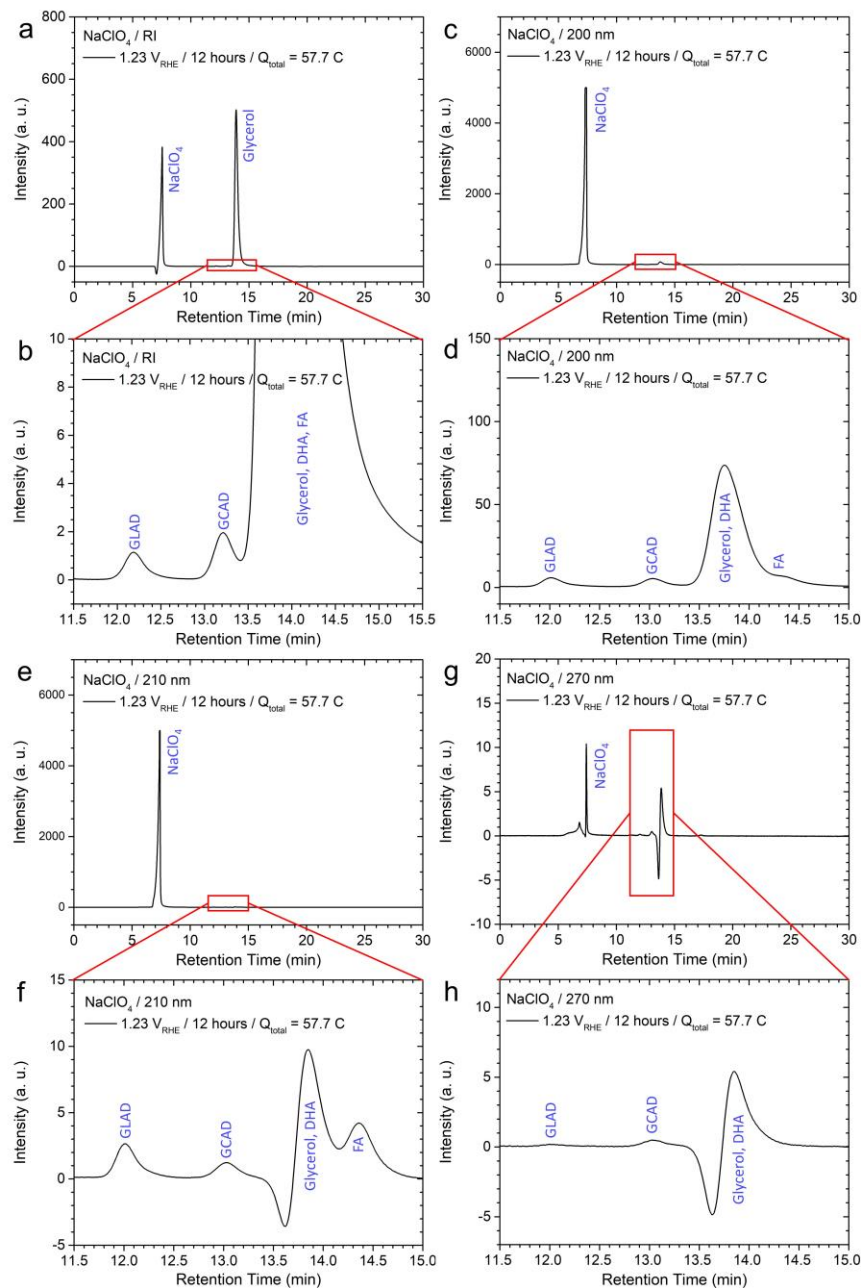

**Figure S14.** Product analysis using high-performance liquid chromatography (HPLC) in the  $\text{NaClO}_4$  case. Chronoamperometry was performed in a pH 2  $\text{NaClO}_4$  (0.5 M) solution containing 0.5 M glycerol at a constant potential of  $1.23 V_{\text{RHE}}$  for 12 hours, after which the solution was collected and analyzed. Chromatograms obtained using **(a, b)** a refractive index (RI) detector, **(c, d)** a UV detector at 200 nm, **(e, f)** a UV detector at 210 nm, and **(g, h)** a UV detector at 270 nm are shown. The lower row plots **(b)**, **(d)**, **(f)**, and **(h)** display magnified chromatograms of the regions highlighted by red rectangles in the upper row plots.

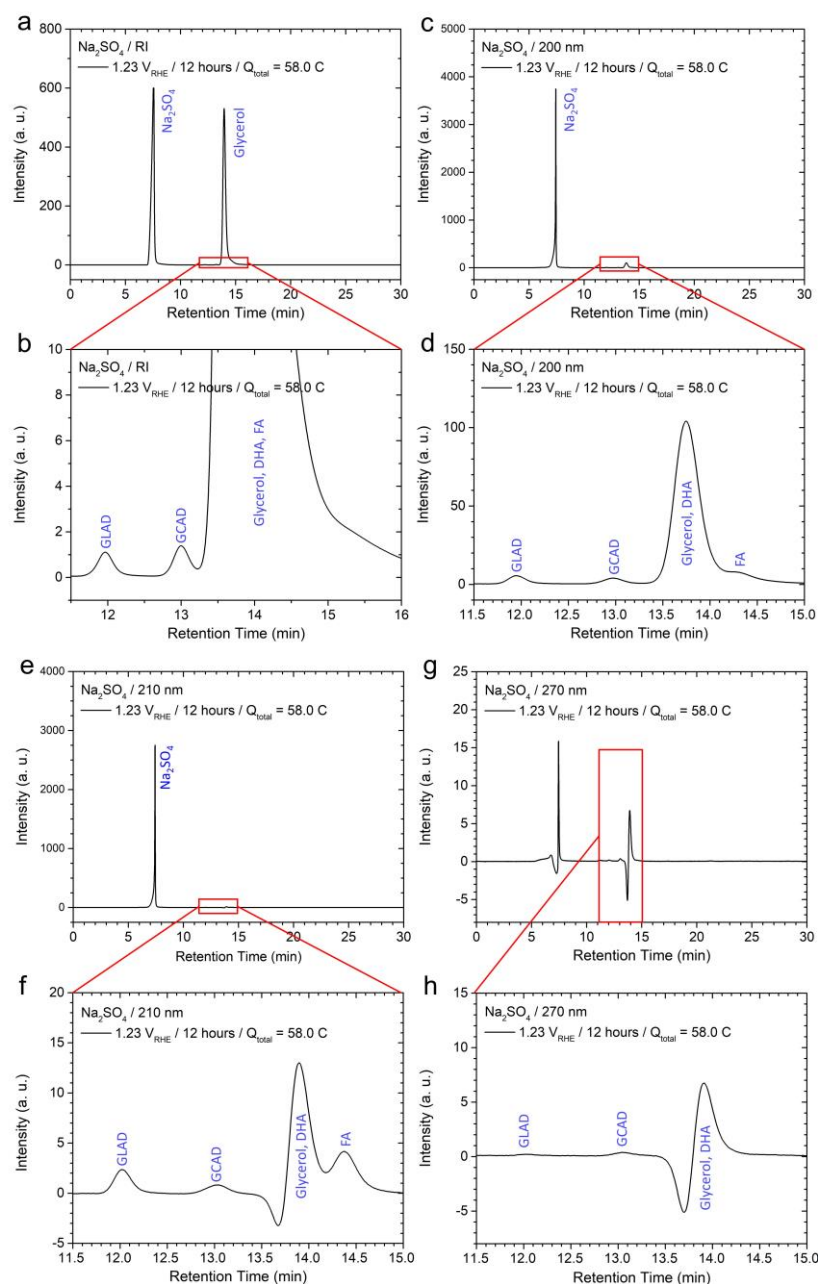

**Figure S15.** Product analysis using high-performance liquid chromatography (HPLC) in the  $\text{Na}_2\text{SO}_4$  case. Chronoamperometry was performed in a pH 2  $\text{Na}_2\text{SO}_4$  (0.5 M) solution containing 0.5 M glycerol at a constant potential of  $1.23 V_{\text{RHE}}$  for 12 hours, after which the solution was collected and analyzed. Chromatograms obtained using (a, b) a refractive index (RI) detector, (c, d) a UV detector at 200 nm, (e, f) a UV detector at 210 nm, and (g, h) a UV detector at 270 nm are shown. The lower row plots (b), (d), (f), and (h) display magnified chromatograms of the regions highlighted by red rectangles in the upper row plots.



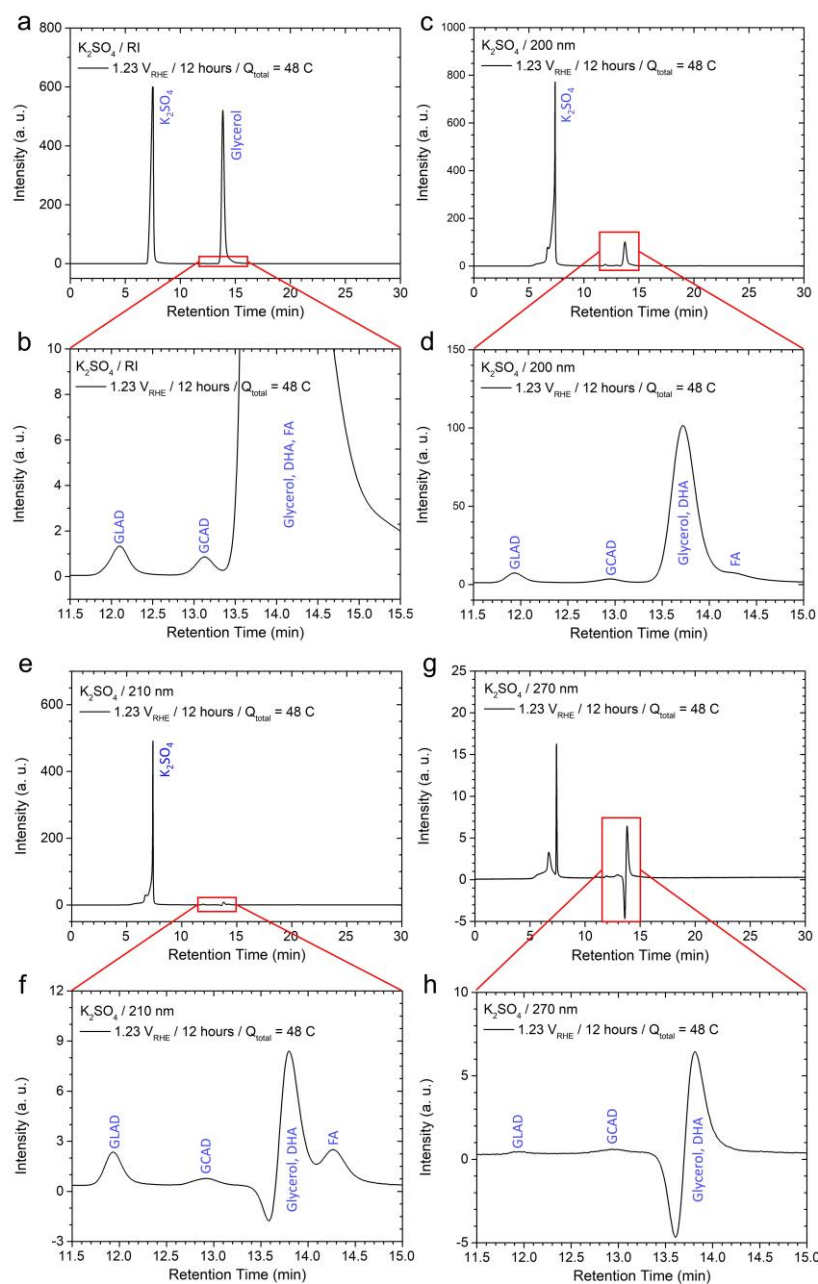

**Figure S16.** Product analysis using high-performance liquid chromatography (HPLC) in the  $\text{K}_2\text{SO}_4$  case. Chronoamperometry was performed in a pH 2  $\text{K}_2\text{SO}_4$  (0.5 M) solution containing 0.5 M glycerol at a constant potential of 1.23  $V_{\text{RHE}}$  for 12 hours, after which the solution was collected and analyzed. Chromatograms obtained using (a, b) a refractive index (RI) detector, (c, d) a UV detector at 200 nm, (e, f) a UV detector at 210 nm, and (g, h) a UV detector at 270 nm are shown. The lower row plots (b), (d), (f) and (h) display magnified chromatograms of the regions highlighted by red rectangles in the upper row plots.

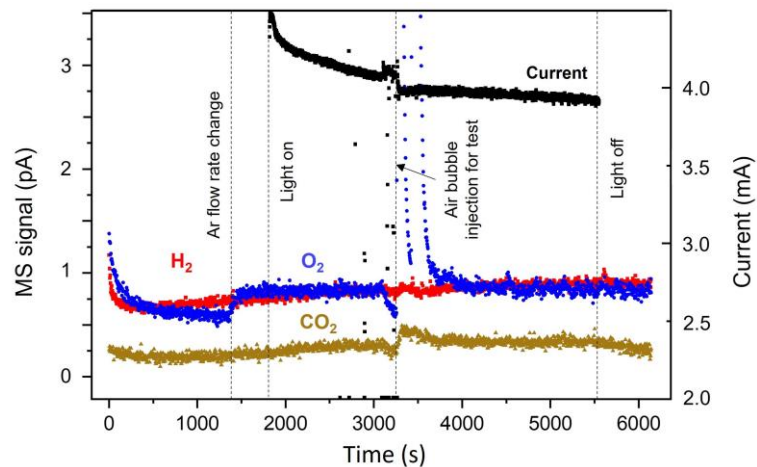

**Figure S17.** Mass spectroscopy (MS) result obtained from PEC measurement with  $\text{BiVO}_4$  under AM1.5 illumination at a constant potential of  $1.23 V_{\text{RHE}}$  in pH 2  $\text{NaNO}_3$  solution containing 0.5 M glycerol. During the measurement, the analyte was separated using a Nafion membrane. The outlet of the analyte was connected to a micro-capillary tube that was further connected to a mass spectrometer (HPR-40, HIDEN Analytical).

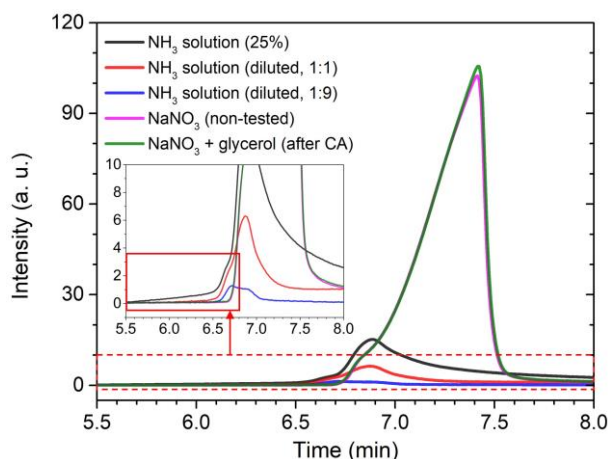

**Figure S18.** Chromatograms of aqueous ammonia ( $\text{NH}_3$ ) solutions and pH 2  $\text{NaNO}_3$  solutions ( $\text{NaNO}_3$  concentration = 0.5 M) obtained via high-performance liquid chromatography (HPLC).  $\text{NH}_3$  solutions were prepared by diluting a 25% assay aqueous  $\text{NH}_3$  solution with deionized water at ratios of 1:1 (red curve) and 1:9 (blue curve); for instance, in the 1:9 dilution, 10 mL of ammonia solution was mixed with 90 mL of deionized water. Signals that peak at 6.9 min with onset of < 6.5 min are attributed to  $\text{NH}_3$ . The magenta curve represents the chromatogram of the pH 2  $\text{NaNO}_3$  solution, and the olive curve represents the chromatogram of the  $\text{NaNO}_3$  solution, initially containing 0.5 M glycerol, obtained after the photoelectrochemical (PEC) chronoamperometry measurement conducted at 1.23  $V_{\text{RHE}}$  for 12 hours. If nitrate reduction reaction (NRR) occurs at the cathode during our experiments, signals of  $\text{NH}_3$  are therefore expected in the chromatogram of  $\text{NaNO}_3$  solutions after the PEC measurements. The fact that there is no feature observed until ~6.7 min (the onset of  $\text{NaNO}_3$  signal that peaks at ~7.2 min) suggests that NRR cannot be detected in our experiments.

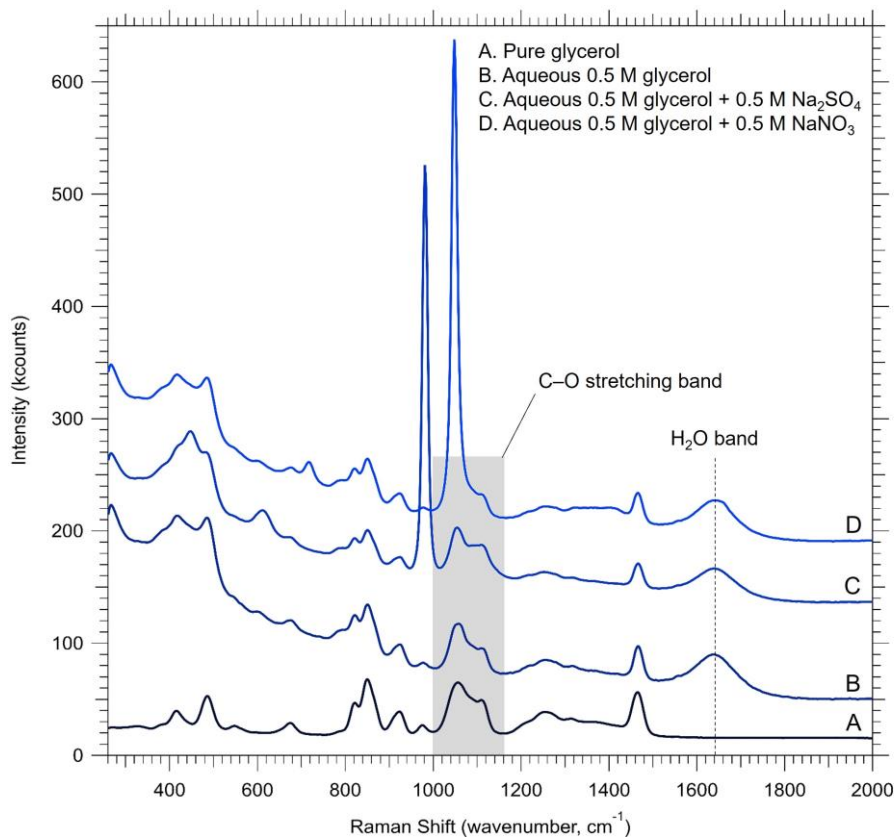

**Figure S19.** Full range Raman scattering spectra taken on different liquid samples, at a laser wavelength of 785 nm and a total spectral power of 450 mW. The spectrometer (Wasatch Photonics WP785ER) has an average spectral resolution of about  $5\text{ cm}^{-1}$ . The Raman shift scale was calibrated using the Si  $520\text{ cm}^{-1}$  mode. The spectra have been recorded at about  $22\text{ }^{\circ}\text{C}$ , using a 2 mL optical grade-quartz cuvette.

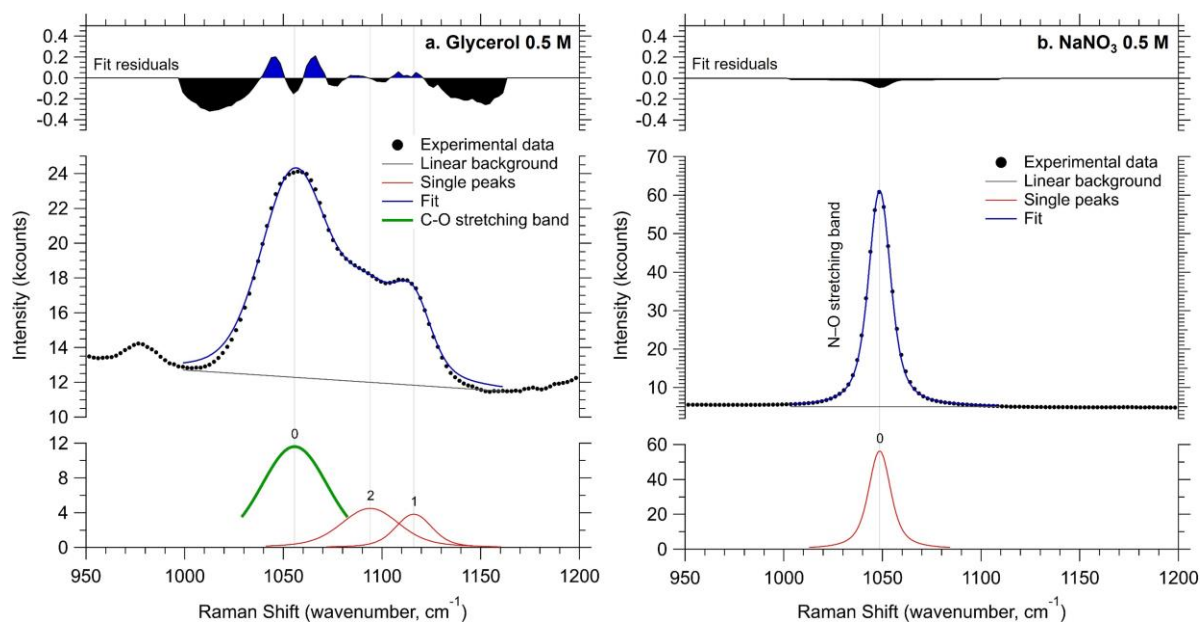

**Figure S20.** C–O stretching band region for the spectral references, 0.5 M glycerol (a) and 0.5 NaNO<sub>3</sub> (b). The spectra have been recorded at about 22 °C, using a 2 mL optical grade-quartz cuvette, at a laser wavelength of 785 nm, and a total spectral power of 450 mW.

### 3. Tables for the Supporting Information

**Table S1.** Water oxidation photocurrent values expressed in  $\text{mA cm}^{-2}$  at  $1.23 \text{ V}_{\text{RHE}}$ , extracted from **Figure S4**.

| Without glycerol                    | $\text{KPi}$    | $\text{K}_2\text{SO}_4$ | $\text{Na}_2\text{SO}_4$ | $\text{NaNO}_3$ | $\text{NaClO}_4$ |
|-------------------------------------|-----------------|-------------------------|--------------------------|-----------------|------------------|
| Sample 1                            | 0.60            | 0.49                    | 0.55                     | 0.55            | 0.63             |
| Sample 2                            | 0.50            | 0.55                    | 0.63                     | 0.57            | 0.59             |
| Sample 3                            | 0.53            | 0.46                    | 0.58                     | 0.68            | 0.68             |
| Average ( $\pm$ standard deviation) | $0.55 \pm 0.04$ | $0.50 \pm 0.04$         | $0.59 \pm 0.03$          | $0.60 \pm 0.05$ | $0.64 \pm 0.04$  |

**Table S2.** Glycerol oxidation photocurrent values expressed in mA cm<sup>-2</sup> at 1.23 V<sub>RHE</sub>, extracted from **Figure S5**.

| 0.1 M glycerol                 | KP <sub>i</sub> | K <sub>2</sub> SO <sub>4</sub> | Na <sub>2</sub> SO <sub>4</sub> | NaClO <sub>4</sub> | NaNO <sub>3</sub> |
|--------------------------------|-----------------|--------------------------------|---------------------------------|--------------------|-------------------|
| Sample 1                       | 1.18            | 1.74                           | 2.26                            | 2.82               | 2.85              |
| Sample 2                       | 1.02            | 1.71                           | 1.98                            | 3.09               | 2.51              |
| Sample 3                       | 1.01            | 1.74                           | 2.15                            | 3.00               | 2.76              |
| Average (± standard deviation) | 1.07 ± 0.08     | 1.73 ± 0.02                    | 2.13 ± 0.11                     | 2.97 ± 0.11        | 2.70 ± 0.14       |

**Table S3.** The impact of adding 50 mM protons to the pH of the 0.5 M  $\text{KPi}$  + 0.1 M glycerol solution.

| 0.5 M $\text{KPi}$<br>+ 0.1 M glycerol | Experiment 1 | Experiment 2 | Experiment 2 | Average         |
|----------------------------------------|--------------|--------------|--------------|-----------------|
| Initial pH                             | 2.01         | 2.00         | 1.99         | $2.00 \pm 0.01$ |
| Final pH                               | 1.94         | 1.93         | 1.93         | $1.93 \pm 0.01$ |
| $\Delta\text{pH}$                      | 0.07         | 0.07         | 0.06         | $0.07 \pm 0.01$ |



**Table S4.** The impact of adding 50 mM protons to the pH of the 0.5 M K<sub>2</sub>SO<sub>4</sub> + 0.1 M glycerol solution.

| 0.5 M K <sub>2</sub> SO <sub>4</sub><br>+ 0.1 M glycerol | Experiment 1 | Experiment 2 | Experiment 2 | Average     |
|----------------------------------------------------------|--------------|--------------|--------------|-------------|
| Initial pH                                               | 1.98         | 1.99         | 2.01         | 1.99 ± 0.01 |
| Final pH                                                 | 1.80         | 1.79         | 1.81         | 1.80 ± 0.01 |
| ΔpH                                                      | 0.18         | 0.20         | 0.20         | 0.19 ± 0.01 |

**Table S5.** The impact of adding 50 mM protons to the pH of the 0.5 M Na<sub>2</sub>SO<sub>4</sub> + 0.1 M glycerol solution.

| 0.5 M Na <sub>2</sub> SO <sub>4</sub><br>+ 0.1 M glycerol | Experiment 1 | Experiment 2 | Experiment 2 | Average     |
|-----------------------------------------------------------|--------------|--------------|--------------|-------------|
| Initial pH                                                | 1.98         | 1.97         | 2.00         | 1.98 ± 0.01 |
| Final pH                                                  | 1.70         | 1.70         | 1.75         | 1.72 ± 0.02 |
| ΔpH                                                       | 0.28         | 0.27         | 0.25         | 0.27 ± 0.01 |

**Table S6.** The impact of adding 50 mM protons to the pH of the 0.5 M NaClO<sub>4</sub> + 0.1 M glycerol solution.

| 0.5 M NaClO <sub>4</sub><br>+ 0.1 M glycerol | Experiment 1 | Experiment 2 | Experiment 2 | Average     |
|----------------------------------------------|--------------|--------------|--------------|-------------|
| Initial pH                                   | 1.98         | 2.01         | 1.99         | 2.00 ± 0.01 |
| Final pH                                     | 1.39         | 1.34         | 1.40         | 1.38 ± 0.03 |
| ΔpH                                          | 0.59         | 0.67         | 0.59         | 0.62 ± 0.05 |

**Table S7.** The impact of adding 50 mM protons to the pH of the 0.5 M NaNO<sub>3</sub> + 0.1 M glycerol solution.

| 0.5 M NaNO <sub>3</sub><br>+ 0.1 M glycerol | Experiment 1 | Experiment 2 | Experiment 2 | Average     |
|---------------------------------------------|--------------|--------------|--------------|-------------|
| Initial pH                                  | 2.02         | 1.98         | 1.97         | 1.99 ± 0.02 |
| Final pH                                    | 1.12         | 1.18         | 1.28         | 1.19 ± 0.07 |
| ΔpH                                         | 0.90         | 0.80         | 0.69         | 0.80 ± 0.09 |
